# Supplementary material
Source: PubMed Central journal article supplement (PMC6980512)
Supplement: NIHMS1535119-supplement-11307_2019_1404_MOESM1_ESM.pdf [file NIHMS1535119-supplement-11307_2019_1404_MOESM1_ESM.pdf]

## Electronic Supplementary Material

### Preclinical Dosimetry, Imaging, and Targeted Radionuclide Therapy Studies of Lu-177 Labeled Albumin-Binding, PSMA-Targeted CTT1403

#### Journal: Molecular Imaging and Biology

Xiaoxi Ling<sup>1</sup>, Joseph D. Latoche<sup>1</sup>, Cindy J. Choy<sup>2</sup>, Brenda F. Kurland<sup>3</sup>, Charles M. Laymon<sup>4,5</sup>, Yijun Wu<sup>6,7</sup>, Nathan Salamacha<sup>6,7</sup>, Ding Shen<sup>1</sup>, Jonathan J. Geruntho<sup>1</sup>, Lora H. Rigatti<sup>8,9</sup>, Hillarie P. Windish<sup>2</sup>, Beatrice Langton-Webster<sup>2</sup>, Clifford E. Berkman<sup>2</sup>, and Carolyn J. Anderson<sup>1,4,5,10\*</sup>

1. Department of Medicine, University of Pittsburgh, Pittsburgh, PA
2. Cancer Targeted Technology, Woodinville, WA
3. Department of Biostatistics, University of Pittsburgh, Pittsburgh, PA
4. Department of Radiology, University of Pittsburgh, Pittsburgh, PA
5. Department of Bioengineering, University of Pittsburgh, Pittsburgh, PA
6. Department of Developmental Biology, University of Pittsburgh, Pittsburgh, PA
7. Rangos Research Center Animal Imaging Core, Children's Hospital of Pittsburgh of UPMC, Pittsburgh, PA
8. Division of Laboratory Animal Resources, University of Pittsburgh, Pittsburgh, PA
9. University of Pittsburgh Cancer Institute, University of Pittsburgh, Pittsburgh, PA
10. Department of Pharmacology & Chemical Biology, University of Pittsburgh, Pittsburgh, PA

**\*Corresponding Author**

Carolyn J. Anderson, PhD

Department of Medicine

University of Pittsburgh

3501 Fifth Ave Room 10020

Pittsburgh, PA 15260

Phone: 412-624-6887

Fax: 412-648-6101

E-mail: andersoncj@upmc.edu

### Radiolabeling of CTT1403.

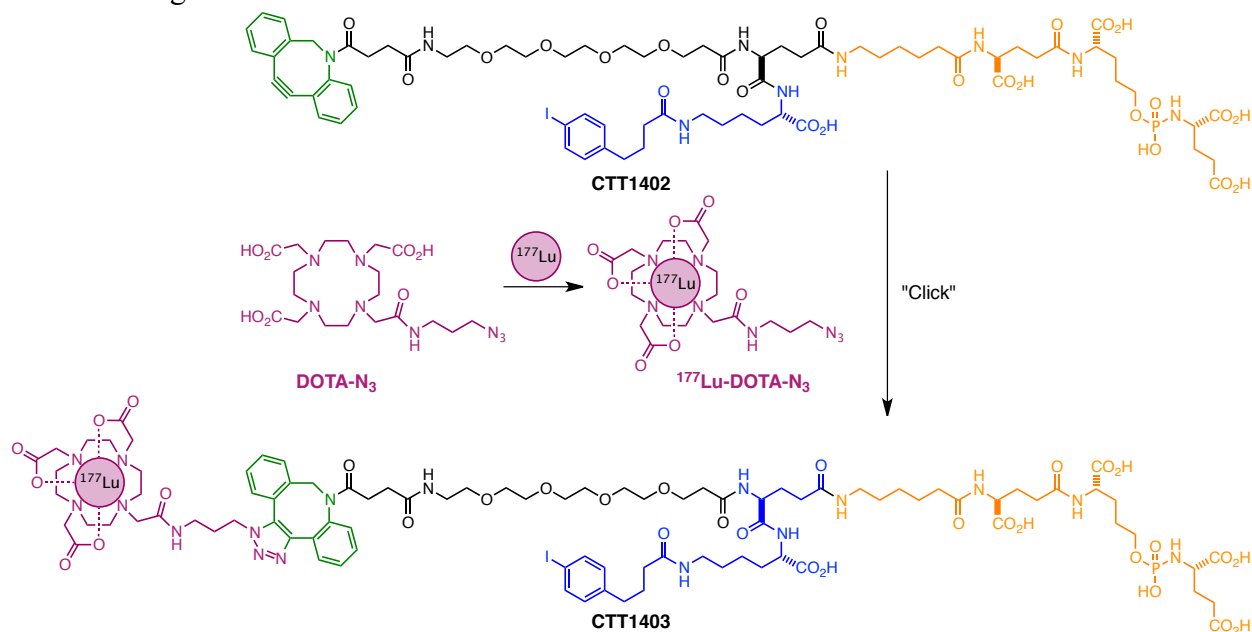

The radiolabeling procedure of CTT1403 was reported previously<sup>1</sup>. Briefly, <sup>177</sup>Lu-DOTA-N<sub>3</sub> was first prepared by mixing DOTA-N<sub>3</sub> (5.3 mM, 10 – 25  $\mu$ L), <sup>177</sup>LuCl<sub>3</sub> (10 – 20 mCi), and gentisic acid (56 mM, 10  $\mu$ L) in a 0.5 M ammonium acetate buffer (pH 4.7 – 4.8, 100 – 150  $\mu$ L) and agitated at 95 °C for 1 h. After confirmation of formation of <sup>177</sup>Lu-DOTA-N<sub>3</sub> by radio-HPLC, CTT1402 (20 mM, 5 – 20  $\mu$ L) was added to the mixture and the resulting mixture was agitated at 37 °C for 1 h. CTT1403 was then isolated from the mixture using radio-HPLC. The solvent was removed using a nitrogen flow under mild heating (37 – 45 °C). The final product was reconstituted in saline before administration.

### Radiolabeling of CTT1751.

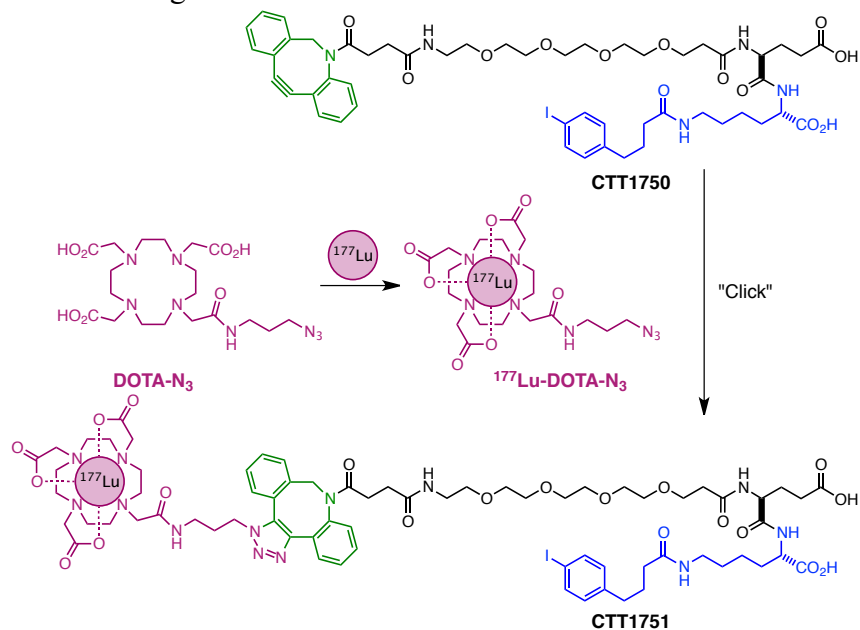

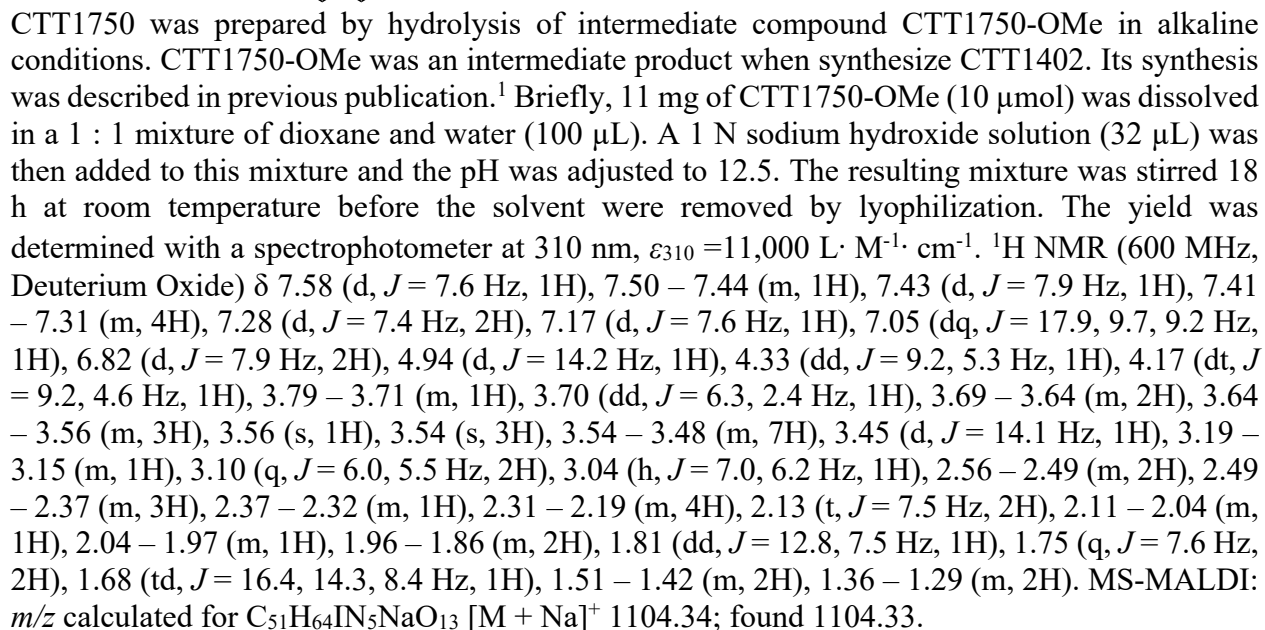

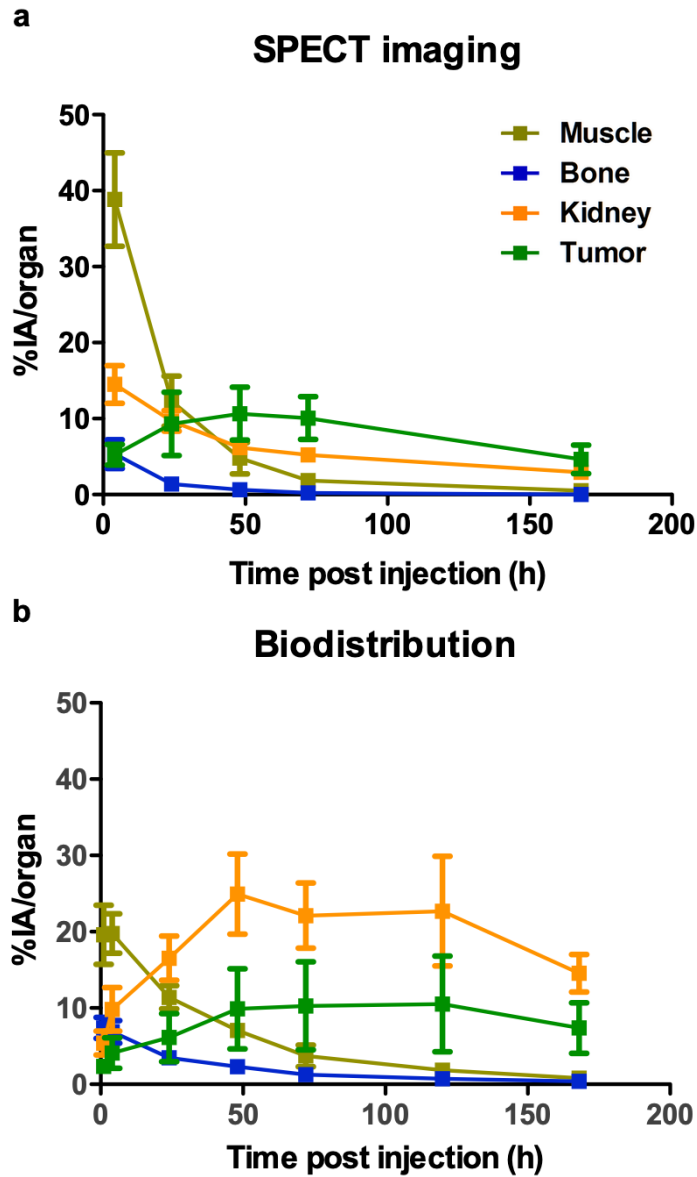

Supplemental Figure 1 Comparison of (a)SPECT/CT tumor/organ uptake value to (b) previously reported biodistribution study.<sup>1</sup>

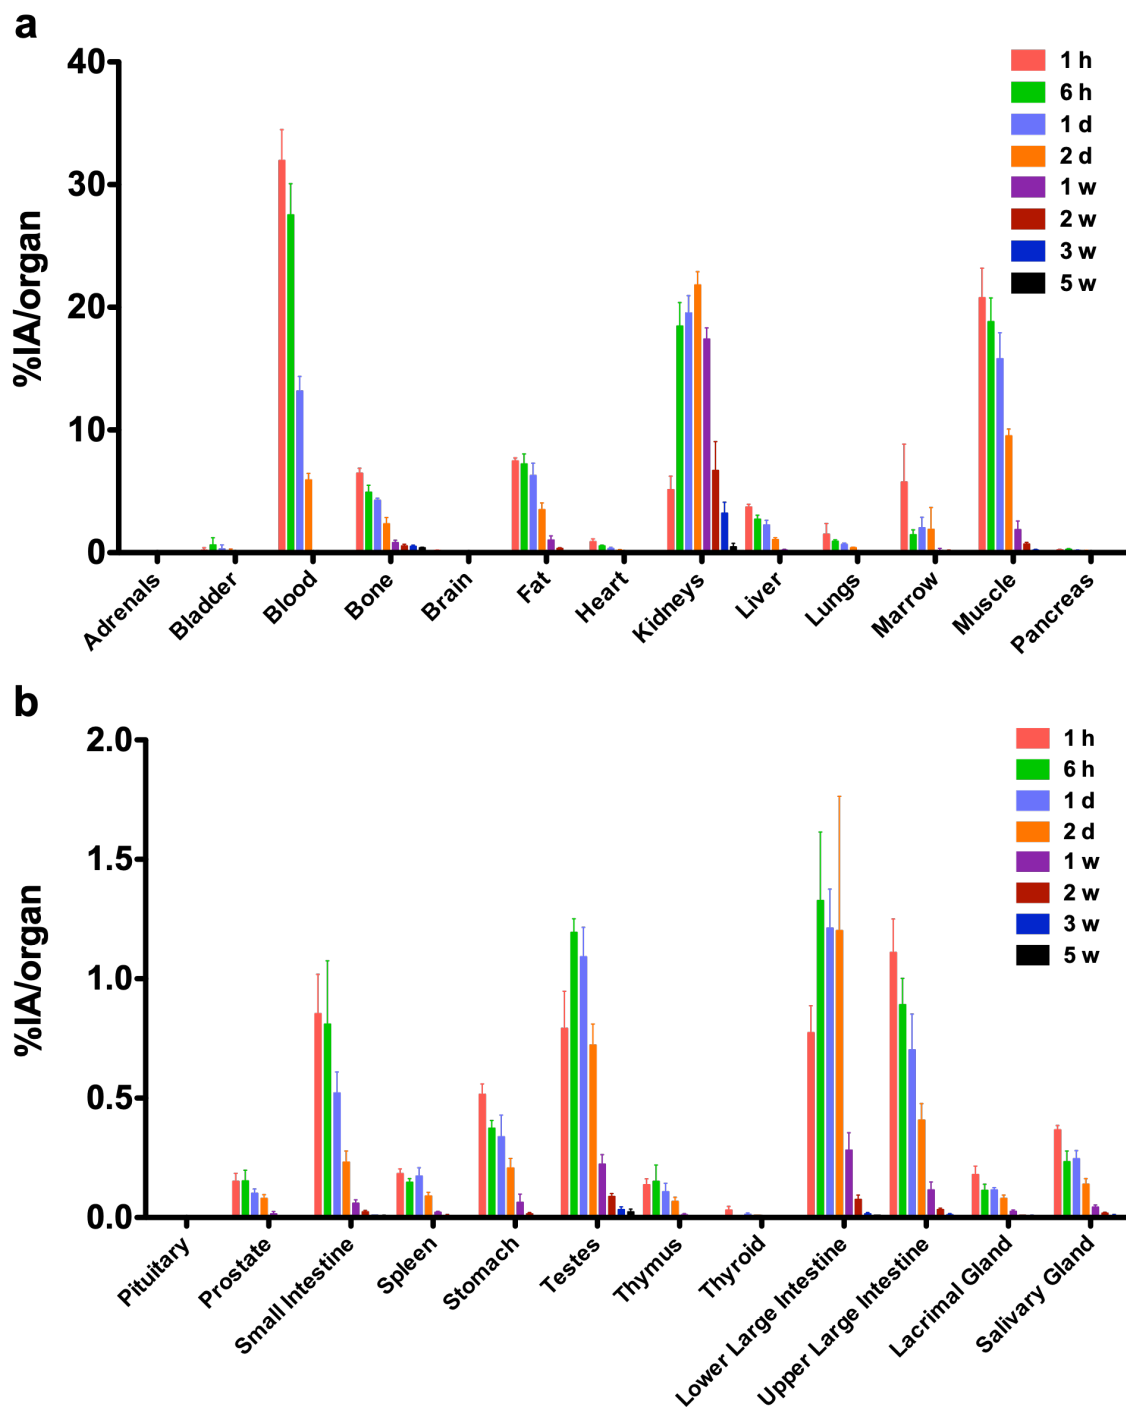

Supplemental Figure 2 Rat dosimetry study of CTT1403 1 h, 6 h, 1 d, 2 d, 1 w, 2 w, 3 w and 5 w post injection in %IA/organ. (a) biodistribution in adrenals through pancreas; (b) biodistribution in organs pituitary through salivary glands.

Supplemental Table 1 Number of disintegrations in source organs (residence time):

|          |          |                                   |
|----------|----------|-----------------------------------|
| Adrenals | 1.96E-02 | MBq-h/MBq or $\mu$ Ci-h/ $\mu$ Ci |
|----------|----------|-----------------------------------|

|                          |          |                                   |
|--------------------------|----------|-----------------------------------|
| Brain                    | 1.86E-01 | MBq-h/MBq or $\mu$ Ci-h/ $\mu$ Ci |
| Breasts                  | 0.00E+00 | MBq-h/MBq or $\mu$ Ci-h/ $\mu$ Ci |
| Gallbladder Contents     | 0.00E+00 | MBq-h/MBq or $\mu$ Ci-h/ $\mu$ Ci |
| LLI                      | 8.71E-02 | MBq-h/MBq or $\mu$ Ci-h/ $\mu$ Ci |
| Small Intestine          | 2.48E-01 | MBq-h/MBq or $\mu$ Ci-h/ $\mu$ Ci |
| Stomach                  | 3.80E-02 | MBq-h/MBq or $\mu$ Ci-h/ $\mu$ Ci |
| ULI                      | 7.18E-02 | MBq-h/MBq or $\mu$ Ci-h/ $\mu$ Ci |
| Heart Contents           | 0.00E+00 | MBq-h/MBq or $\mu$ Ci-h/ $\mu$ Ci |
| Heart Wall               | 2.80E-01 | MBq-h/MBq or $\mu$ Ci-h/ $\mu$ Ci |
| Kidneys                  | 1.79E+01 | MBq-h/MBq or $\mu$ Ci-h/ $\mu$ Ci |
| Liver                    | 9.14E-01 | MBq-h/MBq or $\mu$ Ci-h/ $\mu$ Ci |
| Lungs                    | 1.16E+00 | MBq-h/MBq or $\mu$ Ci-h/ $\mu$ Ci |
| Muscle                   | 9.99E+00 | MBq-h/MBq or $\mu$ Ci-h/ $\mu$ Ci |
| Ovaries                  | 0.00E+00 | MBq-h/MBq or $\mu$ Ci-h/ $\mu$ Ci |
| Pancreas                 | 7.99E-02 | MBq-h/MBq or $\mu$ Ci-h/ $\mu$ Ci |
| Red Marrow               | 7.29E-01 | MBq-h/MBq or $\mu$ Ci-h/ $\mu$ Ci |
| Cortical Bone            | 1.70E+00 | MBq-h/MBq or $\mu$ Ci-h/ $\mu$ Ci |
| Trabecular Bone          | 4.25E-01 | MBq-h/MBq or $\mu$ Ci-h/ $\mu$ Ci |
| Spleen                   | 1.24E-01 | MBq-h/MBq or $\mu$ Ci-h/ $\mu$ Ci |
| Testes                   | 4.09E-02 | MBq-h/MBq or $\mu$ Ci-h/ $\mu$ Ci |
| Thymus                   | 1.46E-02 | MBq-h/MBq or $\mu$ Ci-h/ $\mu$ Ci |
| Thyroid                  | 2.28E-02 | MBq-h/MBq or $\mu$ Ci-h/ $\mu$ Ci |
| Urinary Bladder Contents | 1.44E-01 | MBq-h/MBq or $\mu$ Ci-h/ $\mu$ Ci |
| Uterus/Uterine Wall      | 0.00E+00 | MBq-h/MBq or $\mu$ Ci-h/ $\mu$ Ci |
| Remainder                | 1.28E+01 | MBq-h/MBq or $\mu$ Ci-h/ $\mu$ Ci |

#### Reference

1. Choy, C. J.; Ling, X.; Geruntho, J. J.; Beyer, S. K.; Latoche, J. D.; Langton-Webster, B.; Anderson, C. J.; Berkman, C. E., (177)Lu-Labeled Phosphoramidate-Based PSMA Inhibitors: The Effect of an Albumin Binder on Biodistribution and Therapeutic Efficacy in Prostate Tumor-Bearing Mice. *Theranostics* **2017**, 7 (7), 1928-1939.
